# Supplementary material for: Hierarchical CuOx–Co3O4 heterostructure nanowires decorated on 3D porous nitrogen-doped carbon nanofibers as flexible and free-standing anodes for high-performance lithium-ion batteries
Source: Royal Society of Chemistry journal article supplement (doi:10.1039/c9ta00275h), 2019-01-01
Supplement: c9ta00275h1.pdf [file c9ta00275h1.pdf]

**Hierarchical CuO<sub>x</sub>-Co<sub>3</sub>O<sub>4</sub> heterostructure nanowires decorated on 3D porous nitrogen-doped carbon nanofibers as flexible and free-standing anodes for high performance lithium-ion batteries**

Huanhui Chen, Jiao He, Yongliang Li\*, Shan Luo, Lingna Sun, Xiangzhong Ren\*, Libo Deng, Peixin Zhang,  
Yuan Gao, Jianhong Liu

College of Chemistry and Environmental Engineering, Shenzhen University, Shenzhen, Guangdong 518060, P.R. China

Corresponding author:

Xiangzhong Ren, Email: renxz@szu.edu.cn, Tel/Fax: +86-755-26558134

Yongliang Li, Email: liyli@szu.edu.cn, Tel/Fax: +86-755-26536627

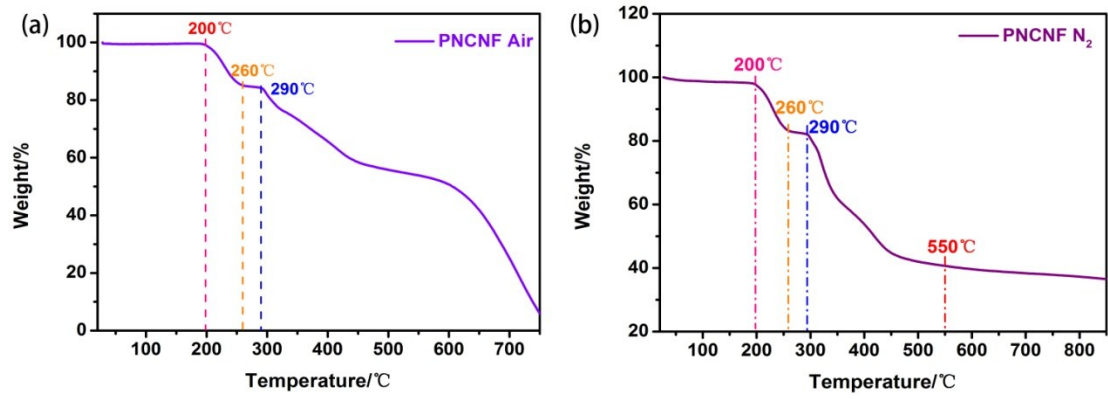

Fig. S1. TG curve of PNCNF precursor films under (a) air and (b) N<sub>2</sub> atmosphere.

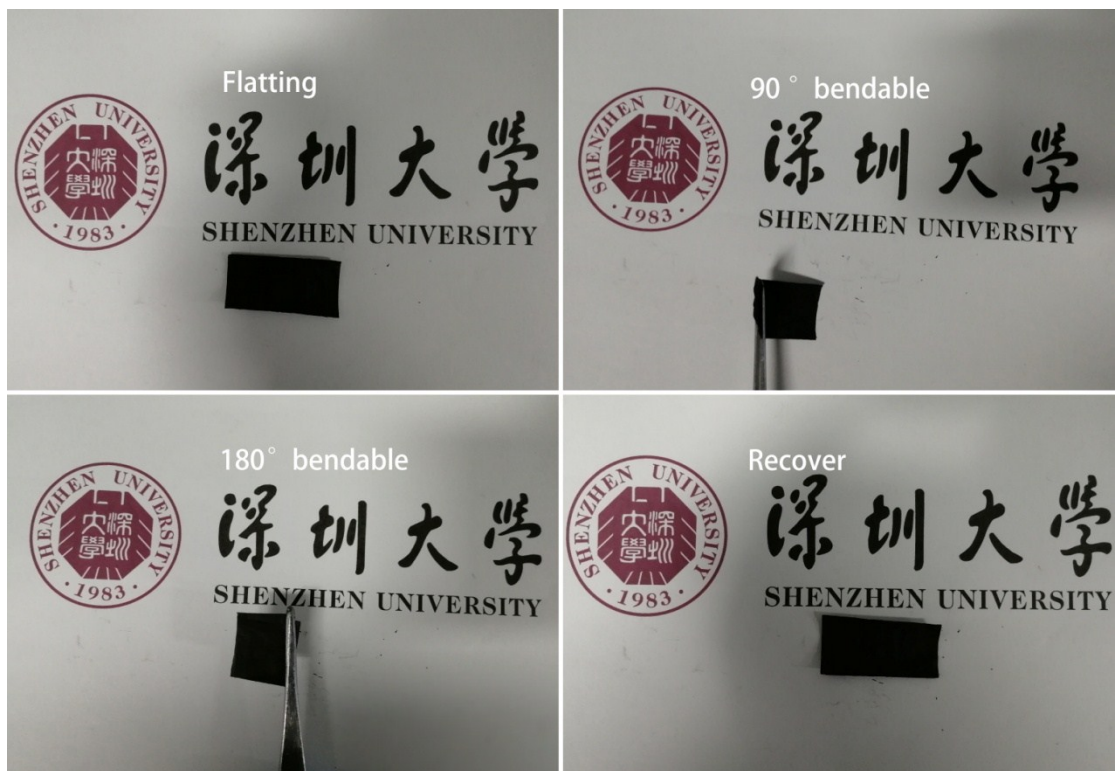

Fig S2. Digital images of PNCNF film under flattening, bending (90°, 180°) and recovered states.

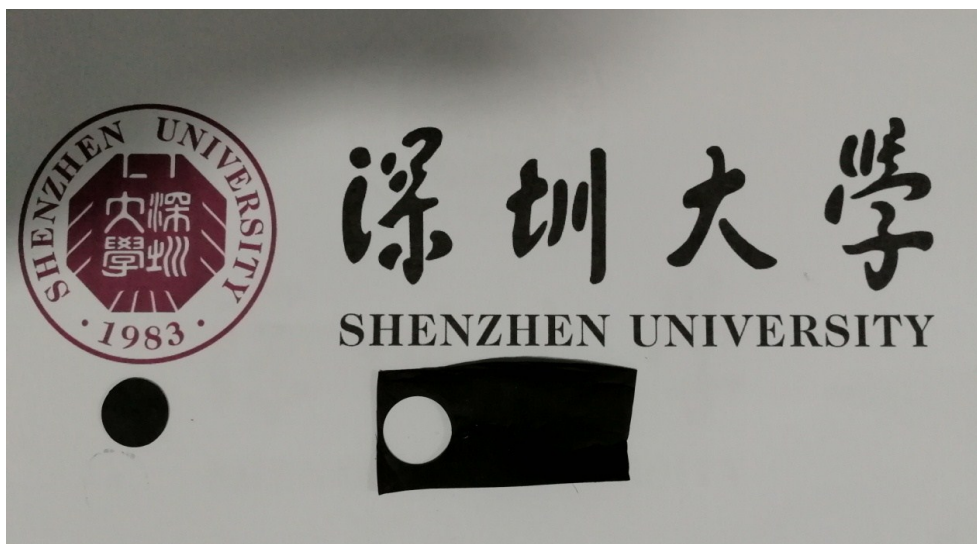

Fig. S3. Digital image of  $\text{CuO}_x\text{-Co}_3\text{O}_4$ @PNCNF electrode.

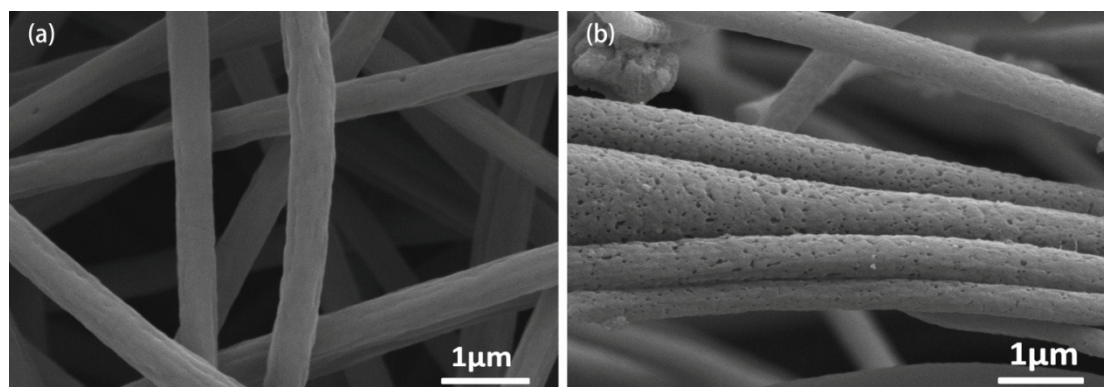

Fig. S4. SEM images of the (a) NCNF (without CTAB) and (b) PNCNF (with CTAB) at different magnifications.

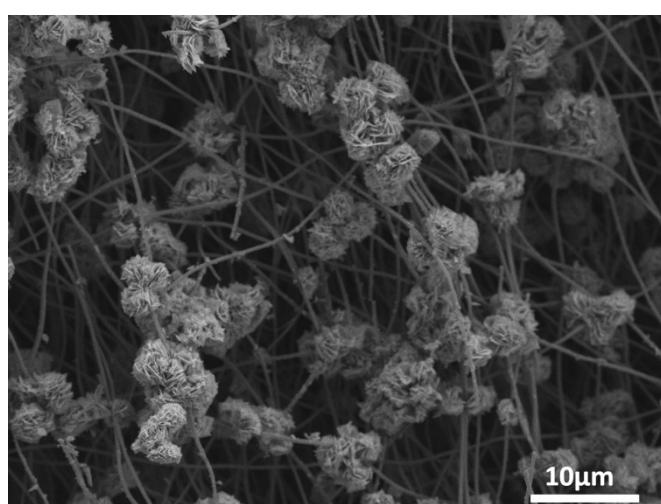

Fig. S5. SEM image of  $\text{CuO}_x\text{-Co}_3\text{O}_4$ @NCNF electrode without CTAB.

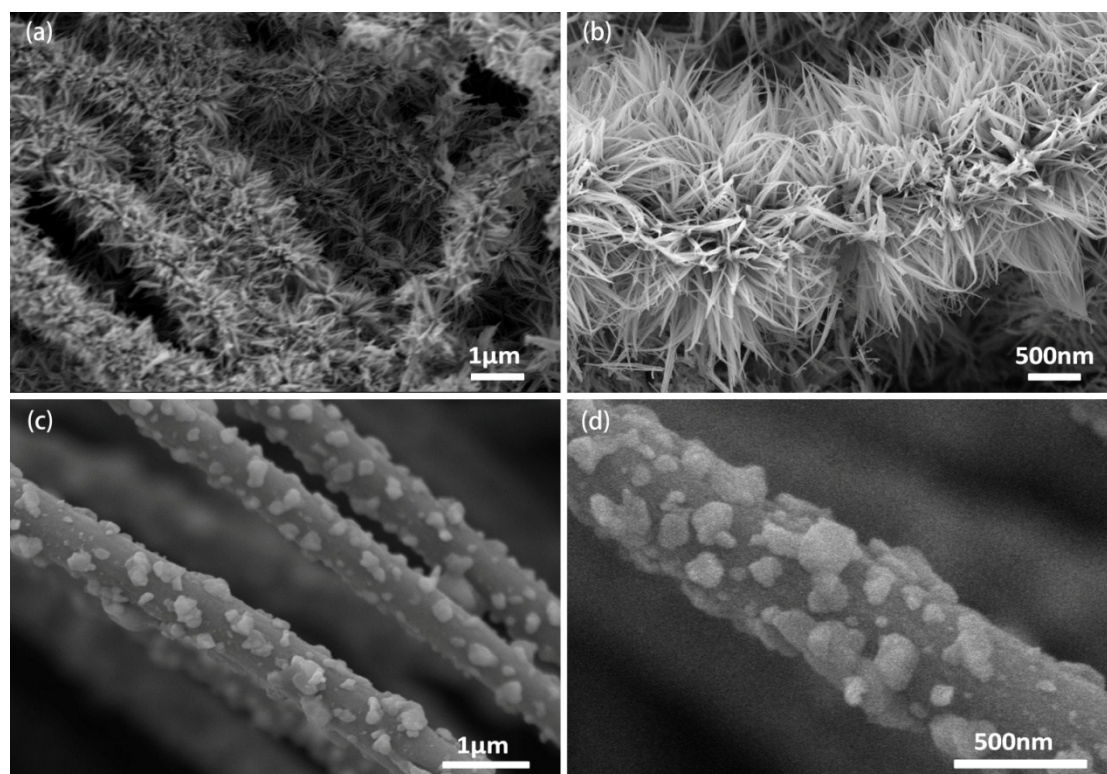

**Fig. S6.** SEM images of the (a and b) Co<sub>3</sub>O<sub>4</sub>@NCNF and (c and d) CuO<sub>x</sub>@PNCNF at different magnifications.

**Table S1** The elemental composition of CuO<sub>x</sub>-Co<sub>3</sub>O<sub>4</sub>@PNCNF composite.

| Element | Weight % | Atomic % |
|---------|----------|----------|
| C K     | 6.69     | 20.82    |
| N K     | 0.96     | 2.56     |
| O K     | 10.97    | 25.63    |
| CoK     | 63.04    | 40.15    |
| CuK     | 18.34    | 10.84    |

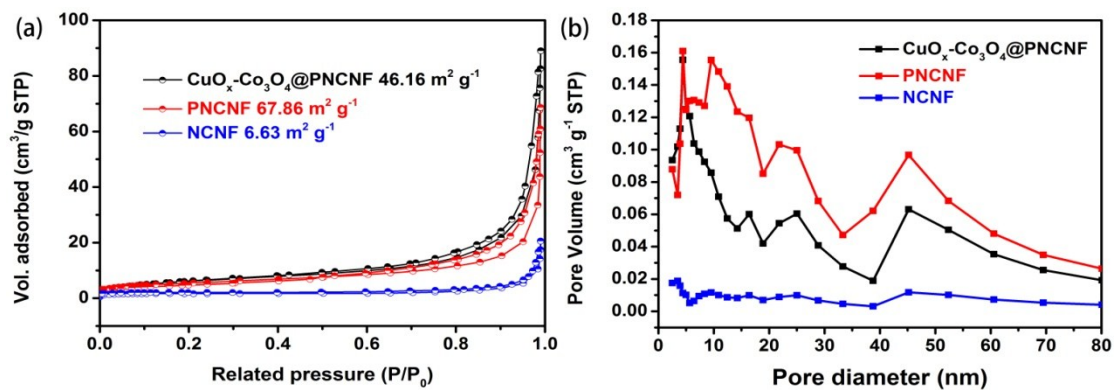

Fig. S7. (a)  $N_2$  adsorption/desorption isotherms and (b) pore size distributions of NCNF, PNCNF and  $CuO_x-Co_3O_4@PNCNF$  samples.

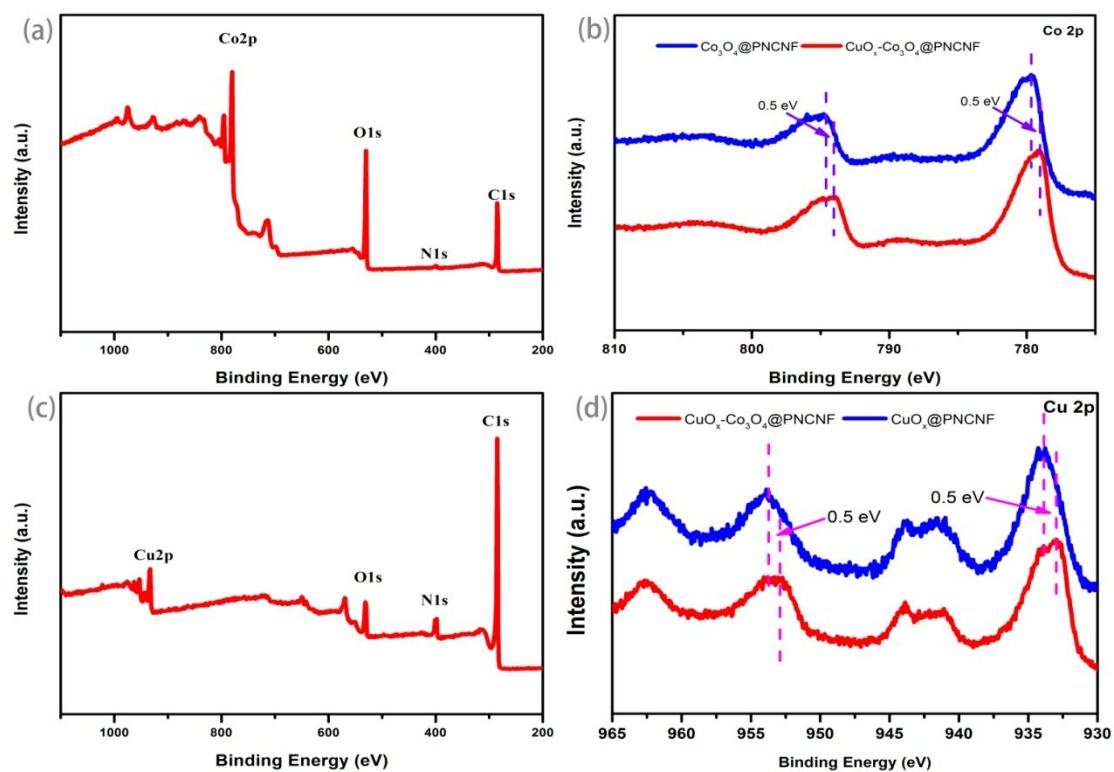

Fig. S8. (a) XPS survey scan spectrum for  $Co_3O_4@PNCNF$  and Core level spectra of (b) Co 2p; (c) XPS full spectrum of  $CuO_x@PNCNF$  and (d) high-resolution spectra of Cu 2p.

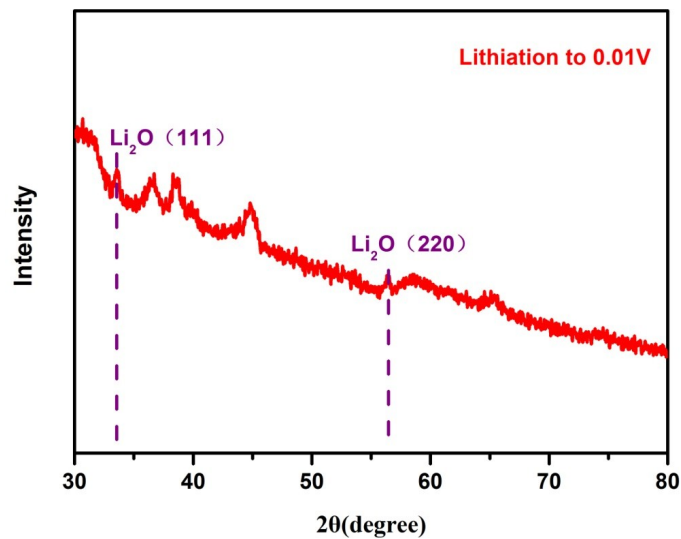

Fig. S9. XRD pattern of  $\text{CuO}_x\text{-Co}_3\text{O}_4\text{@PNCNF}$  lithiated to 0.01V.

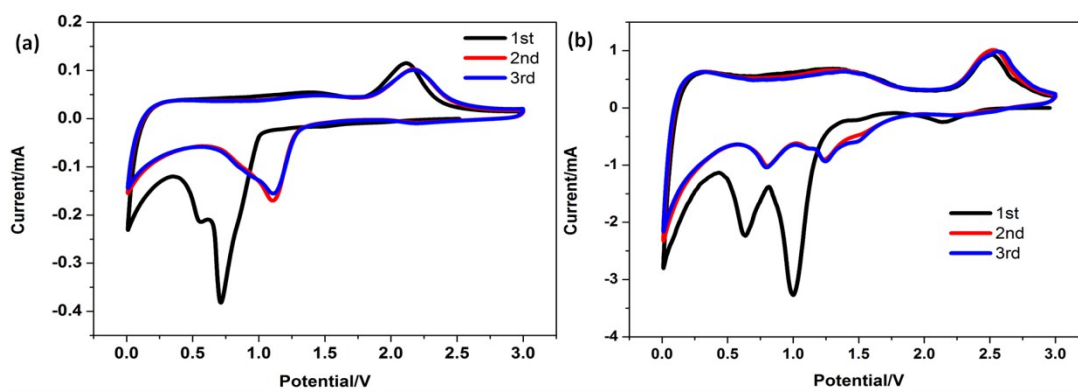

Fig. S10. The first three consecutive CV curves of (a)  $\text{Co}_3\text{O}_4\text{@PNCNF}$  and (b)  $\text{CuO}_x\text{@PNCNF}$ .

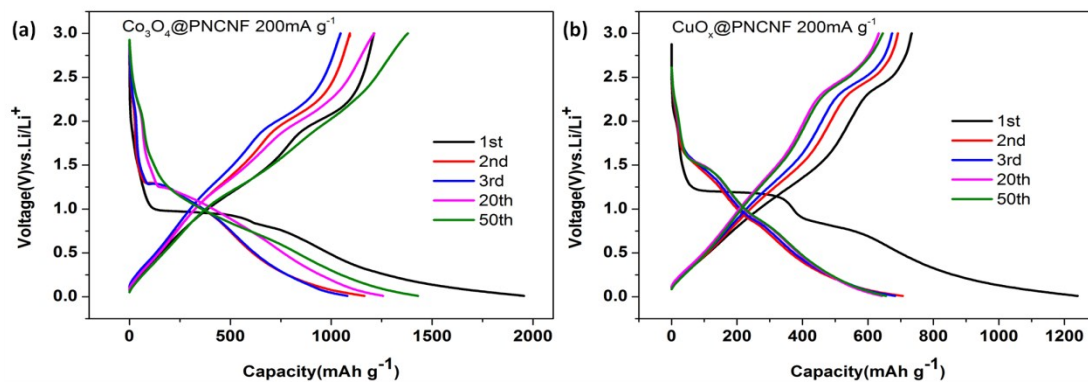

Fig. S11. Discharge-charge curves at a current density of 200  $\text{mA g}^{-1}$ , (a)  $\text{Co}_3\text{O}_4\text{@PNCNF}$  and (b)  $\text{CuO}_x\text{@PNCNF}$ .

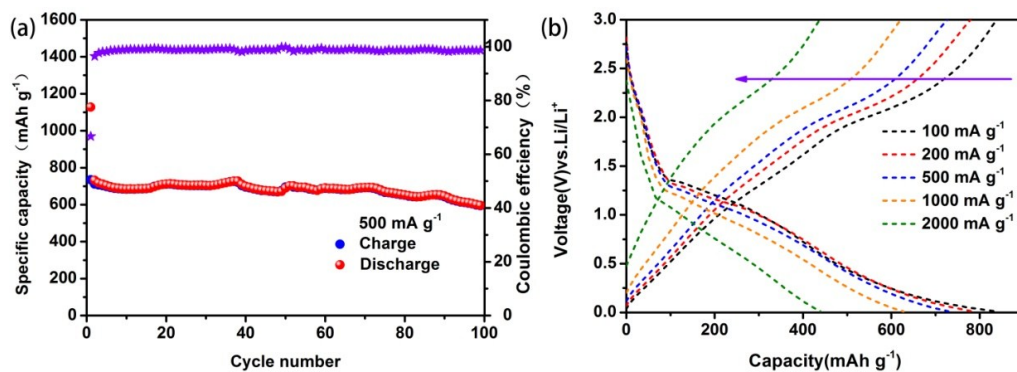

Fig. S12. (a) Cycling performance and Coulombic efficiency of  $\text{CuO}_x\text{-Co}_3\text{O}_4$  electrode at current density of  $500 \text{ mA g}^{-1}$ , (b) Galvanostic

charging/discharging curves at various rates of  $\text{CuO}_x\text{-Co}_3\text{O}_4$  electrode.

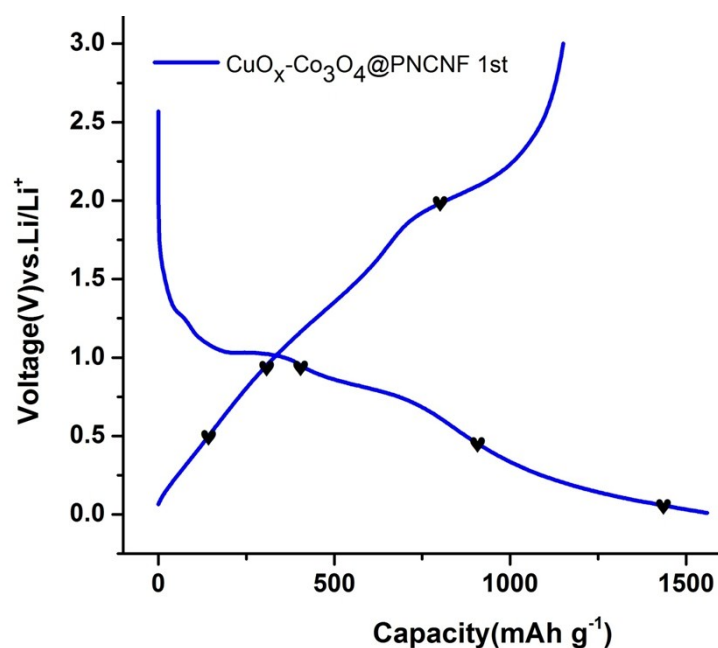

Fig. S13. The first cycle at  $0.2 \text{ A g}^{-1}$  between 0.01 and 3 V.

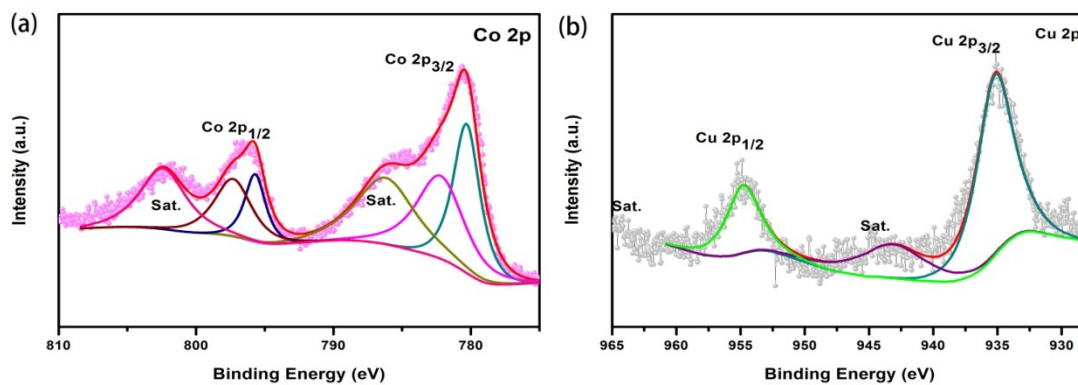

Fig. S14. XPS core level spectra of (a) Co 2p and (b) Cu 2p for  $\text{CuO}_x\text{-Co}_3\text{O}_4\text{@PNCNF}$  at a current density of  $200 \text{ mA g}^{-1}$  after 100 cycles.

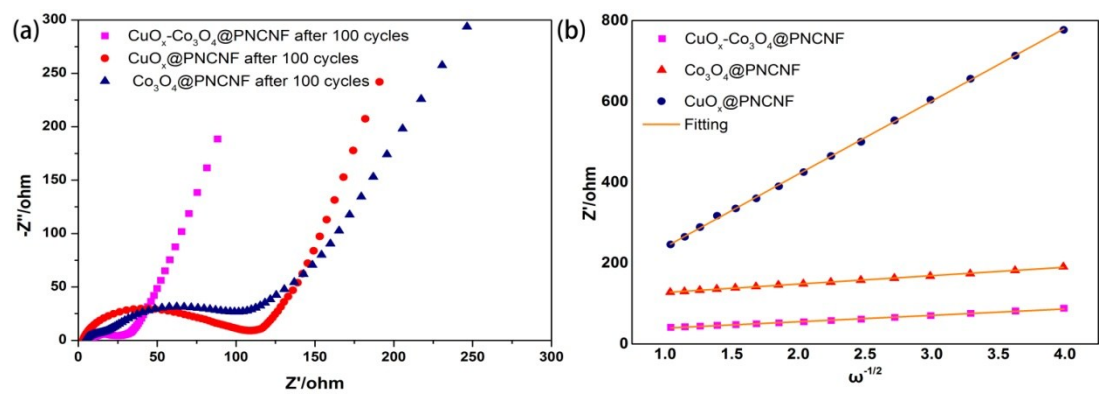

Fig. S15. (a) Nyquist plots of three electrodes e after the 100<sup>th</sup> at 200 mA g<sup>-1</sup>; (b) the corresponding relationships between  $Z_{re}$  and  $\omega^{-1/2}$  in the frequency region of 0.1–0.01 Hz.

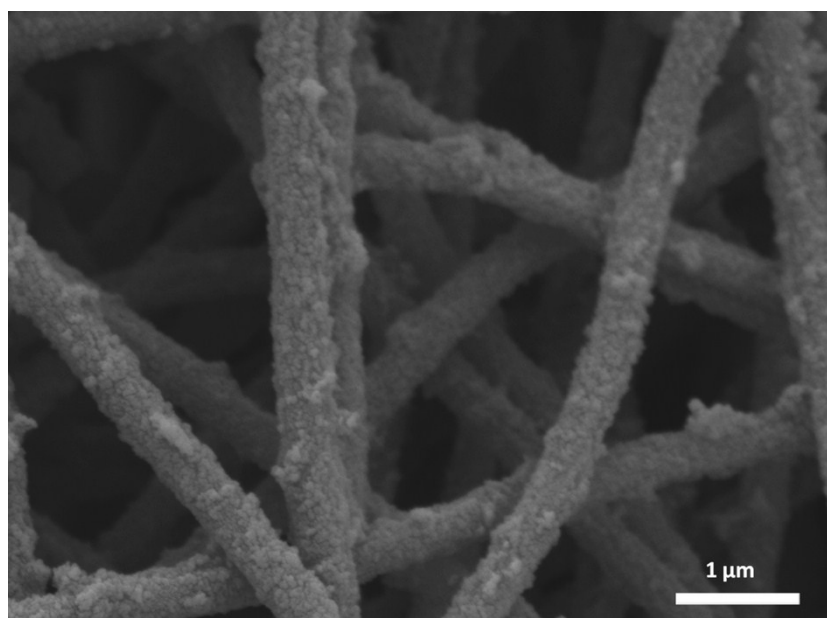

Fig. S16. SEM image of  $\text{CuO}_x\text{-Co}_3\text{O}_4\text{@PNCNF}$  electrode after the 100<sup>th</sup> cycle at 200 mA g<sup>-1</sup>.



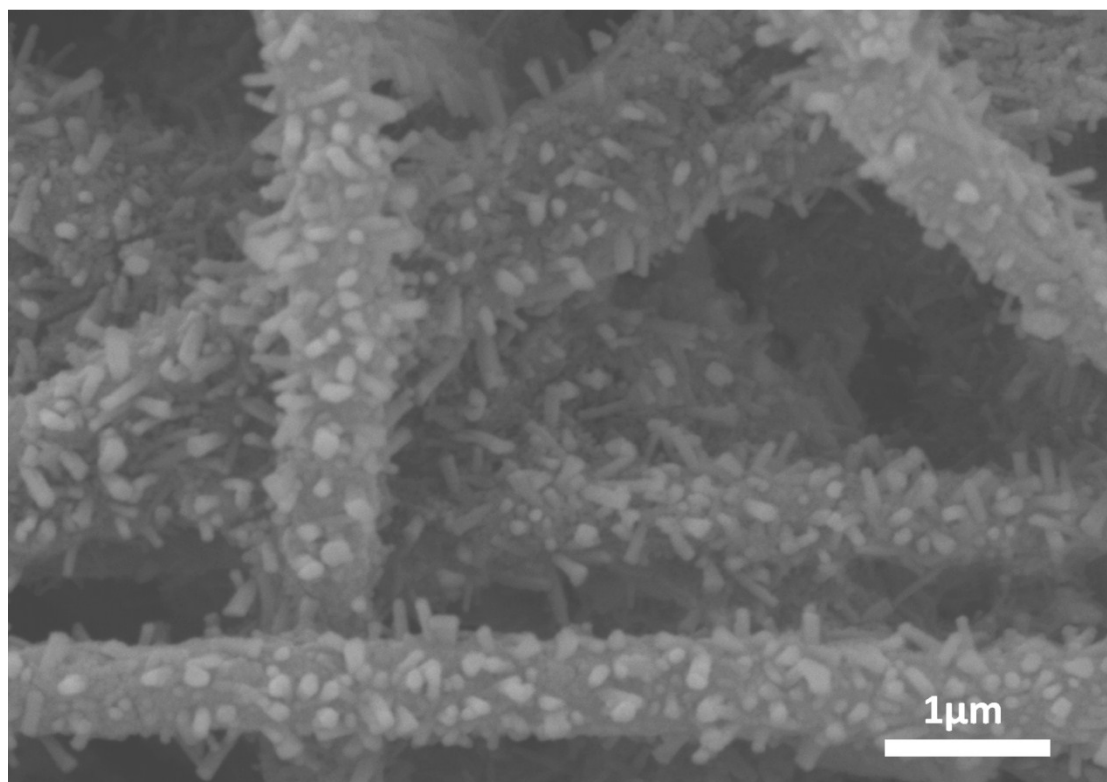

**Fig. S17.** SEM image of CuO<sub>x</sub>@PNCNF electrode after the 100<sup>th</sup> cycle at 200 mA g<sup>-1</sup>.

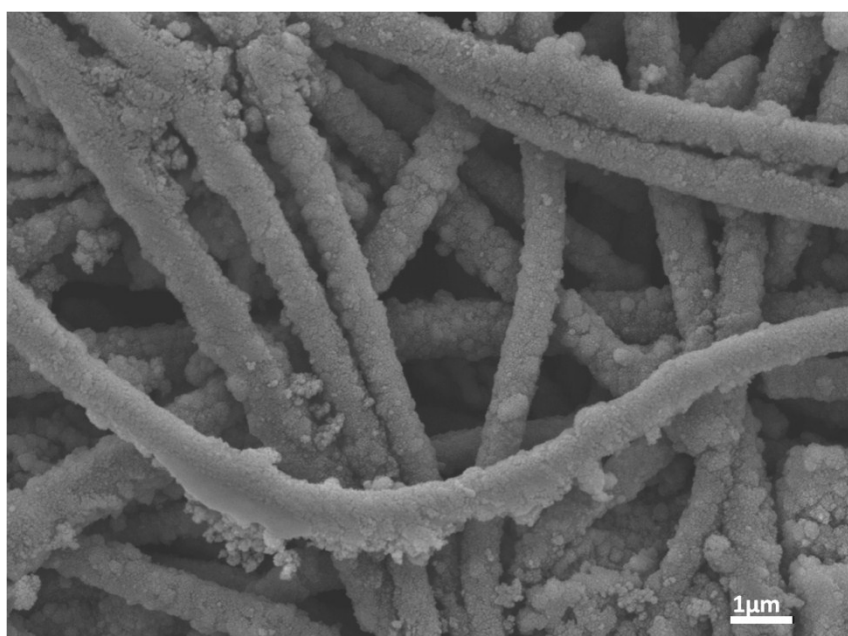

**Fig. S18.** SEM image of Co<sub>3</sub>O<sub>4</sub>@PNCNF electrode after the 100<sup>th</sup> cycle at 200 mA g<sup>-1</sup>.

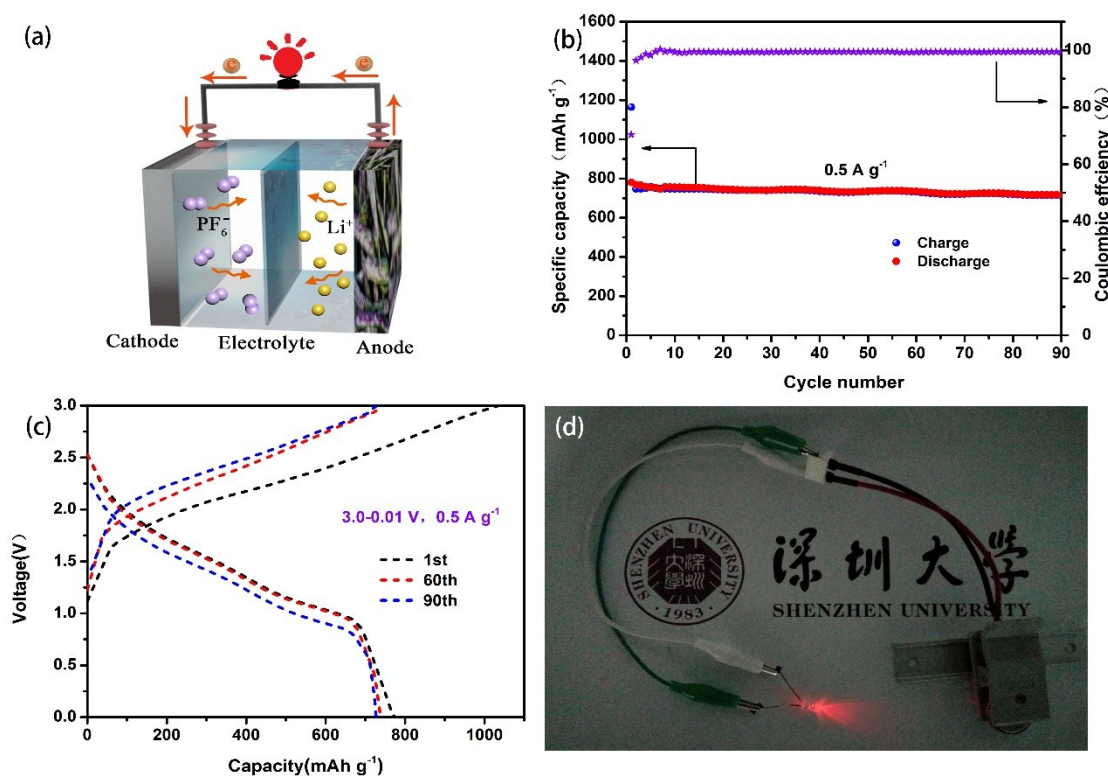

**Fig. S19.** (a) Schematic illustration of the full lithium-ion cell with  $\text{CuO}_x\text{-Co}_3\text{O}_4\text{@PNCNF-LiFePO}_4/\text{Al}$  couple; (b) Charge and discharge curves and (c) cycling performance of the full battery at  $0.5 \text{ A g}^{-1}$  in the voltage range of  $0.01\text{-}3.0 \text{ V}$ ; (d) digital photo of  $\text{CuO}_x\text{-Co}_3\text{O}_4\text{@PNCNF-LiFePO}_4/\text{Al}$  full cells to light red LED.

**Table. S2.** Comparison of the electrochemical lithium storage performance of the  $\text{CuO}_x\text{-Co}_3\text{O}_4\text{@PNCNF}$  electrodes presented in this work and reported electrodes in the literature.

| Materials                                                           | Reversible capacity ( $\text{mAhg}^{-1}$ )/Cycle number |                       |                       |                        |                        | Ref.             |
|---------------------------------------------------------------------|---------------------------------------------------------|-----------------------|-----------------------|------------------------|------------------------|------------------|
|                                                                     | Current density                                         | Current density       | Current density       | Current density        | Current density        |                  |
|                                                                     | $100\text{mA g}^{-1}$                                   | $200\text{mA g}^{-1}$ | $500\text{mA g}^{-1}$ | $1000\text{mA g}^{-1}$ | $2000\text{mA g}^{-1}$ |                  |
| $\text{CuO@C}$ octahedra                                            |                                                         |                       | 512/300th             |                        |                        | 1                |
| F-CuO                                                               |                                                         |                       | 785/100th             | 624/300th              | 370/10th               | 2                |
| $\text{CuO@NiO}$                                                    | 1061/200th                                              |                       | 523/100th             | 376/100th              | 193/400th              | 3                |
| MWCNTs/ $\text{Co}_3\text{O}_4$                                     | 813/100th                                               |                       |                       | 514/10th               |                        | 4                |
| $\text{Co}_3\text{O}_4\text{@TiO}_2$                                |                                                         | 803/100th             |                       | 400/600th              |                        | 5                |
| $\text{Co}_3\text{O}_4/\text{N-C}$                                  |                                                         | 883/130th             |                       | 612/500th              |                        | 6                |
| $\text{Co}_3\text{O}_4/\text{ZnCo}_2\text{O}_4$                     |                                                         |                       |                       |                        | 409/500th              | 7                |
| $\text{NiCo}_2\text{O}_4\text{-C}$ nanorods                         | 1183/200th                                              |                       | 863/200th             |                        | 594/200th              | 8                |
| $\text{CoO@C}$                                                      |                                                         | 991/300th             | 840/300th             |                        | 587/550th              | 9                |
| <b><math>\text{CuO}_x\text{-Co}_3\text{O}_4\text{@PNCNF}</math></b> |                                                         | <b>1122/100th</b>     | <b>889/10th</b>       | <b>812/10th</b>        | <b>663/1000th</b>      | <b>This work</b> |

**Table. S3.**  $R_{ct}$ ,  $\sigma$  and  $D_{Li^+}$  values determined from the EIS for all the electrodes.

|                                                          | $R_{ct}$ ( $\Omega$ ) | $\sigma$ ( $\Omega \text{ cm}^2 \text{ s}^{-0.5}$ ) | $D_{Li^+}$ ( $\text{cm}^2 \text{ s}^{-1}$ ) |
|----------------------------------------------------------|-----------------------|-----------------------------------------------------|---------------------------------------------|
| <b>CuO<sub>x</sub>@PNCNF</b>                             | 73.5                  | 386.8                                               | $1.0 \times 10^{-15}$                       |
| <b>Co<sub>3</sub>O<sub>4</sub>@PNCNF</b>                 | 88.9                  | 280.2                                               | $1.9 \times 10^{-15}$                       |
| <b>CuO<sub>x</sub>-Co<sub>3</sub>O<sub>4</sub>@PNCNF</b> | 35.9                  | 196.6                                               | $3.9 \times 10^{-15}$                       |

## References

1. T. Chen, Y. Hu, B. Cheng, Ren. Chen, H. Lv, L. Ma, G. Zhu, Y. Wang, C. Yan, Z. Tie, Z. Jin, J. Liu, *Nano Energy*, 2016, **20**, 305-314.
2. Z. Ma, K. Rui, Q. Zhang, Y. Zhang, M. Du, D. Li, Q. Wang, X. Huang, J. Zhu and W. Huang, *Small*, 2017, **13**, 1603500.
3. W. Guo, W. Sun and Y. Wang, *ACS Nano*, 2015, **9**, 11462-71.
4. Ga. Huang, . Zhang, X. Du, Y. Qin, D Yin, and L. Wang, *ACS Nano*, 2015, **9**, 1592-9.
5. H. Geng, H. Ang, X. Ding, H. Tan, G. Guo, G. Qu, Y. Yang, J. Zheng, Q. Yan and H. Gu, *Nanoscale*, 2016, **5**, 2967–2973.
6. X. Han, W. Chen, X. Han, Y. Tan, D. Sun, *J. Mater. Chem. A*, 2016, **4**, 13040–13045.
7. W. Song, K. Ji, A. Aguadero, P. Shearing, D. Brett, F. Xie, D. Jason Riley, *Energy Storage Mater.*, 2018, **14**, 324–334.
8. L. Peng, H. Zhang, Y. Bai, J. Yang, Y. Wang, *J. Mater. Chem. A*, 2015, **3**, 22094-22101.
9. F. Wu, S. Zhang, B. Xi, Z. Feng, D. Sun, X. Ma, J. Zhang, J. Feng, S. Xiong, *Adv. Energy Mater.*, 2018, **8**, 1703242.
